# Supplementary material for: Catalytic activity of bare and porous palladium nanostructures in the reduction of 4-nitrophenol
Source: Royal Society of Chemistry journal article supplement (doi:10.1039/c5ra23138h), 2016-01-01
Supplement: c5ra23138h1.pdf [file c5ra23138h1.pdf]

## Catalytic Activity of Bare and Porous Palladium Nanostructures in the Reduction of 4-Nitrophenol

Ajit M. Kalekar<sup>a</sup>, Kiran Kumar K. Sharma<sup>b</sup>, Meitram N. Luwang<sup>c</sup>, Geeta K. Sharma<sup>a\*</sup>

<sup>a</sup>National Centre for Free Radical Research (NCFRR), Department of Chemistry, Savitribai Phule Pune University, Pune, 411007, Maharashtra, India.

<sup>b</sup>School of Nanoscience and Technology, Shivaji University, Kolhapur-416004, Maharashtra, India.

<sup>c</sup>Chemical Engineering Division, National Chemical Laboratory, Pune 411008, Maharashtra, India.

### Electronic Supplementary Information:

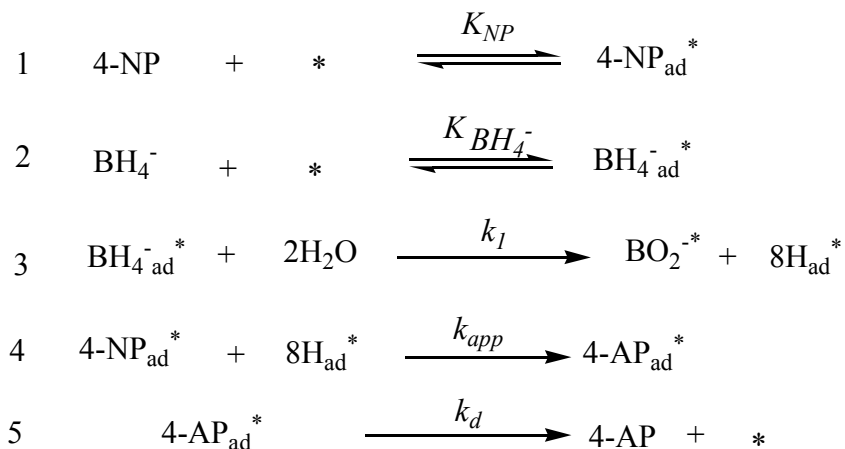

**Scheme 1:** Reduction of 4-NP at the surface of PdNBs. The asterisk (\*) indicates the active site of PdNBs.

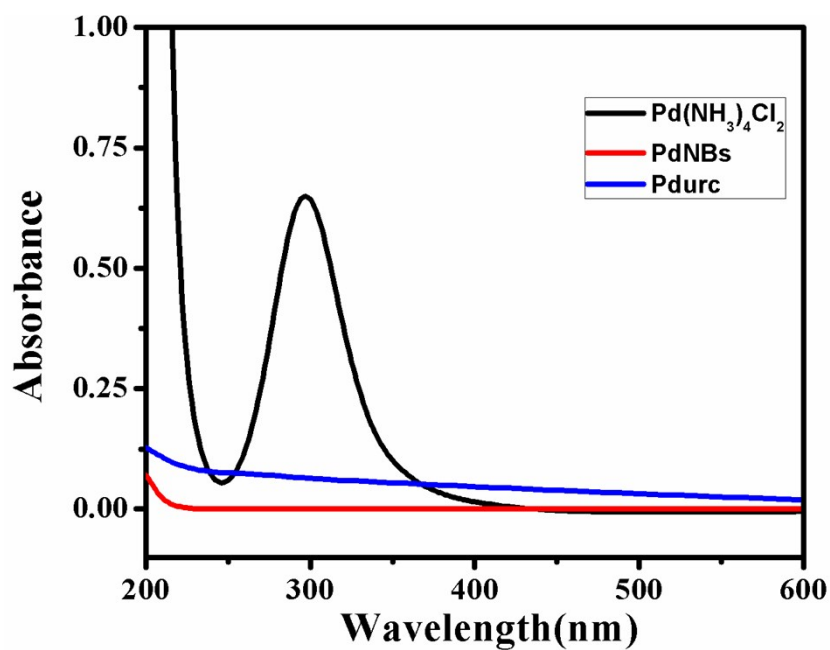

**Fig. 1S.** UV-VIS absorption spectra of Pd(NH<sub>3</sub>)<sub>4</sub>Cl<sub>2</sub>, a palladium metal precursor (black line), synthesized PdNBs (red line) and Pdurc (blue line) after 80 kGy  $\gamma$  irradiation.

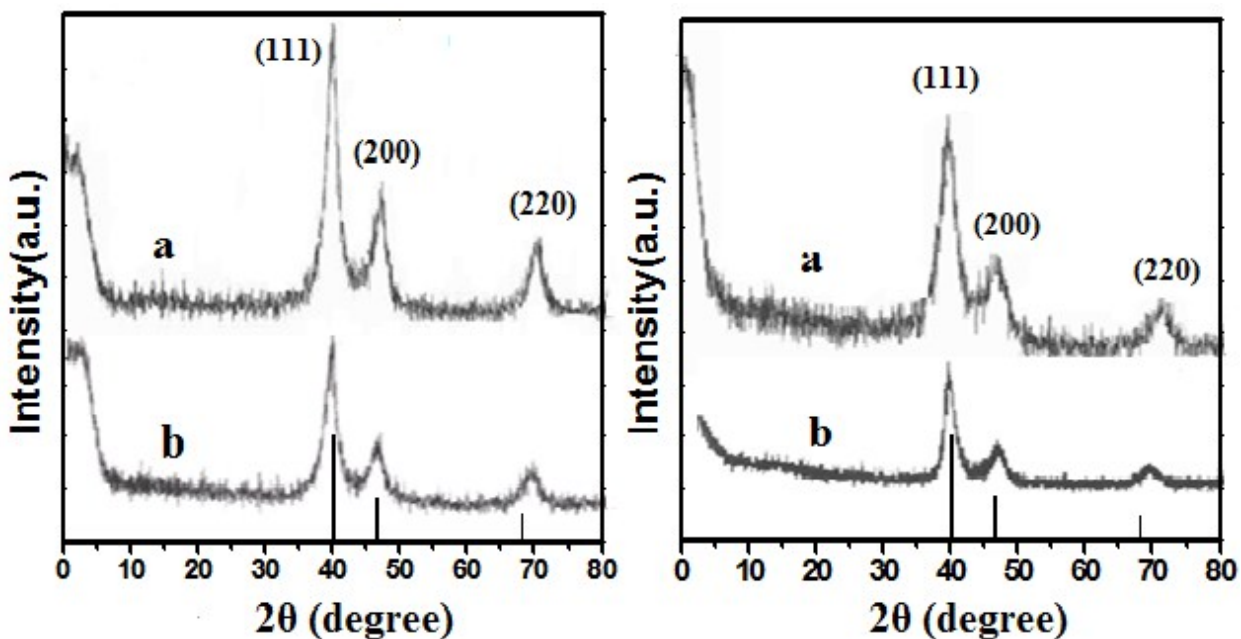

**Fig. 2S.** XRD pattern (left panel) of a) PdNBs, b) Pdurc synthesized in SLCs before 4-NP reduction reaction. Right panel is the XRD pattern of a) PdNBs, b) Pdurc after 4-NP reduction reaction indicates polycrystallinity doesn't affect.

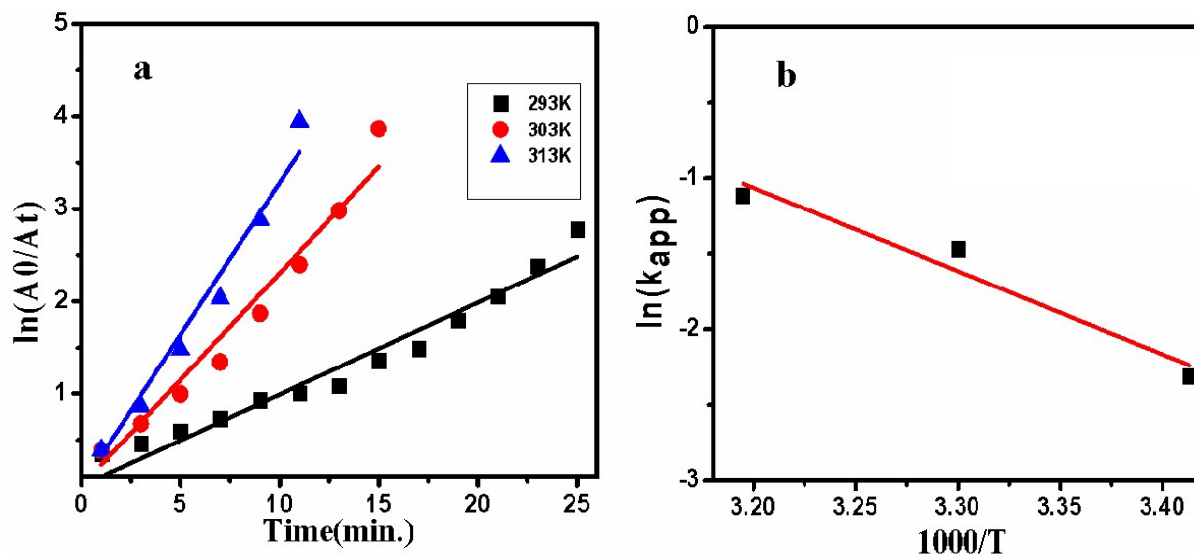

**Fig. 3S.** Temperature dependent reduction reaction of 4-NP to 4-AP by  $\text{NaBH}_4$ ; a) in the presence of PdNBs; b) The corresponding Arrhenius plot of  $\ln(k_{app})$  against  $1000/T$ . Reaction conditions:  $[4\text{-NP}] = 1 \times 10^{-4}$  M;  $[\text{NaBH}_4] = 5 \times 10^{-2}$  M;  $[\text{PdNBs}] = 0.166$  mg/L; scan time = 2 minutes.

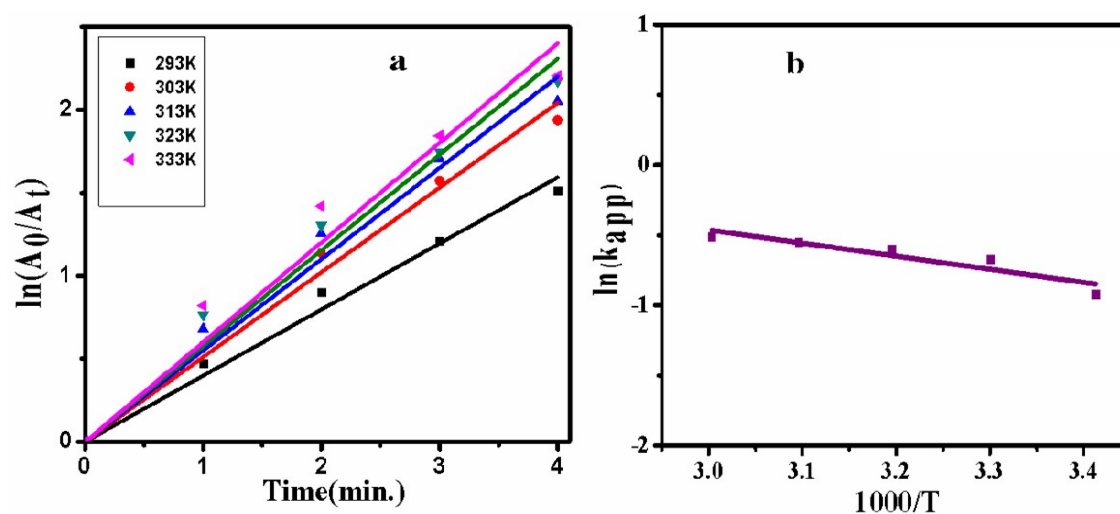

**Fig. 4S.** Temperature dependent reduction reaction of 4-NP by  $\text{NaBH}_4$ ; a) in the presence of Pdurc; b) The corresponding Arrhenius plot of  $\ln(k_{app})$  against  $1000/T$ . Reaction conditions:  $[4\text{-NP}] = 1 \times 10^{-4}$  M;  $[\text{NaBH}_4] = 5 \times 10^{-2}$  M;  $[\text{Pdurc}] = 1.66$  mg/L; scan time = 1 minute.
